# Supplementary material for: Lung Cancer Risk in Men and Compliance with the 2018 WCRF/AICR Cancer Prevention Recommendations
Source: MDPI journal article supplement (doi:10.3390/nu14204295), 2022-10-14
Supplement: s1 [file s1]

# Lung Cancer Risk in Men and Compliance with the 2018 WCRF/AICR Cancer Prevention Recommendations

by Iwona Hawrysz, Lidia Wadolowska, Malgorzata Anna Slowinska, Anna Czerwinska and Janusz Jacek Golota

## Supplementary material

### Pack-years of smoking calculation

Data regarding smoking status was collected for all subjects, including current smoking status, duration, the intensity of smoking, and time since cessation. The pack-years of smoking were calculated by multiplying the average number of packs of cigarettes smoked per day (intensity) by the number of years the person had smoked [71]. Smoking status pack-years were classified into three groups: never smoker (0 pack-years), moderate smoker (2.5–11 pack-years) or heavy smoker (> 11 pack-years). These categories were based on the median value, which, in this sample, was equal to 11 pack-years (at enrolment).

Example of calculation:

A man reported smoking 30 cigarettes a day for ten years.

The calculated number of pack-years is:  $10 \times 30/20 = 15$  pack-years

10—years of smoking

30—number of cigarettes per day

20—number of cigarettes in one pack

**Table S1.** Frequency of food group consumption (times/day; mean (SD)) by categories of compliance with fruit/vegetable consumption # in the case-control sample

| Variable                                                     | Total<br>(0-8 points) | Compliance with fruit/vegetable consumption |                               |                       | <i>p</i> -Value |
|--------------------------------------------------------------|-----------------------|---------------------------------------------|-------------------------------|-----------------------|-----------------|
|                                                              |                       | Lower<br>(0 points)                         | Intermediate<br>(0.25 points) | Higher<br>(0.5 point) |                 |
| Sample size                                                  | 439                   | 151                                         | 143                           | 145                   |                 |
| Fruits and vegetables                                        | 1.3 (0.7)             | 0.6 (0.2)                                   | 1.2 (0.2)                     | 2.0 (0.6)             | <0.0001         |
| <b>Other dietary components of the Ad-LC WCRF/AICR Score</b> |                       |                                             |                               |                       |                 |
| Whole grains and beans                                       | 0.8 (0.8)             | 0.5 (0.6)                                   | 0.7 (0.6)                     | 1.2 (1.0)             | <0.0001         |
| Fast foods/other processed foods high in fat/starches/sugars | 3.3 (1.7)             | 3.1 (1.6)                                   | 3.5 (1.8)                     | 3.5 (1.8)             | 0.0866          |
| Red/processed meats                                          | 2.0 (1.2)             | 1.6 (1.0)                                   | 2.4 (1.3)                     | 2.0 (1.3)             | <0.0001         |
| Sugar-sweetened drinks                                       | 0.1 (0.3)             | 0.1 (0.2)                                   | 0.1 (0.3)                     | 0.1 (0.3)             | 0.9530          |

SD—standard deviation; # To determine compliance with the Ad-LC WCRF/AICR Score, the frequency of fruit/vegetable consumption (times/day) was divided according to tertile distribution: tertile 1 ( $\leq 0.921$ ), tertile 2 ( $> 0.921 < 1.435$ ), tertile 3 ( $\geq 1.435$ ).

**Table S2.** Frequency of food group consumption (times/day; mean (SD)) by categories of compliance with whole grain/bean consumption # in the case-control sample

| Variable                                                     | Total<br>(0-8 points) | Compliance with whole grain/bean consumption |                               |                       |         |
|--------------------------------------------------------------|-----------------------|----------------------------------------------|-------------------------------|-----------------------|---------|
|                                                              |                       | Lower<br>(0 points)                          | Intermediate<br>(0.25 points) | Higher<br>(0.5 point) | p-Value |
| Sample size                                                  | 439                   | 157                                          | 139                           | 143                   |         |
| Whole grains and beans                                       | 0.8 (0.8)             | 0.1 (0.1)                                    | 0.6 (0.2)                     | 1.7 (0.7)             | <0.0001 |
| <b>Other dietary components of the Ad-LC WCRF/AICR Score</b> |                       |                                              |                               |                       |         |
| Fruits and vegetables                                        | 1.3 (0.7)             | 0.9 (0.5)                                    | 1.3 (0.6)                     | 1.6 (0.8)             | <0.0001 |
| Fast foods/other processed foods high in fat/starches/sugars | 3.3 (1.7)             | 3.8 (1.6)                                    | 3.4 (1.8)                     | 2.7 (1.6)             | <0.0001 |
| Red/processed meats                                          | 2.0 (1.2)             | 1.9 (1.0)                                    | 1.9 (1.1)                     | 2.1 (1.0)             | 0.6680  |
| Sugar-sweetened drinks                                       | 0.1 (0.3)             | 0.2 (0.3)                                    | 0.1 (0.3)                     | 0.1 (0.3)             | 0.6965  |

SD—standard deviation; <sup>#</sup>To determine compliance with the Ad-LC WCRF/AICR Score, frequency of whole grain/bean consumption (times/day) was divided according to tertile distribution: tertile 1 ( $\leq 2.000$ ), tertile 2 ( $> 0.200 < 1.050$ ), tertile 3 ( $\geq 1.050$ ).

**Table S3.** Frequency of food group consumption (times/day; mean (SD)) by categories of compliance with red/processed meat consumption <sup>#</sup> in the case-control sample

| Variable                                                     | Total<br>(0-8 points) | Compliance with red/processed meat consumption |                              |                     |         |
|--------------------------------------------------------------|-----------------------|------------------------------------------------|------------------------------|---------------------|---------|
|                                                              |                       | Lower<br>(0 points)                            | Intermediate<br>(0.5 points) | Higher<br>(1 point) | p-Value |
| Sample size                                                  | 439                   | 144                                            | 143                          | 152                 |         |
| Red/processed meats                                          | 2.0 (1.2)             | 3.3 (1.0)                                      | 1.8 (0.3)                    | 0.9 (0.4)           | <0.0001 |
| <b>Other dietary components of the Ad-LC WCRF/AICR Score</b> |                       |                                                |                              |                     |         |
| Fruits and vegetables                                        | 1.3 (0.7)             | 1.5 (0.7)                                      | 1.2 (0.6)                    | 1.1 (0.7)           | <0.0001 |
| Whole grains and beans                                       | 0.8 (0.8)             | 0.8 (0.8)                                      | 0.8 (0.8)                    | 0.8 (0.8)           | 0.9106  |
| Fast foods/other processed foods high in fat/starches/sugars | 3.3 (1.7)             | 3.8 (1.8)                                      | 3.5 (1.6)                    | 2.7 (0.8)           | <0.0001 |
| Sugar-sweetened drinks                                       | 0.1 (0.3)             | 0.2 (0.4)                                      | 0.1 (0.2)                    | 0.1 (0.3)           | 0.0618  |

SD—standard deviation; <sup>#</sup>To determine compliance with the Ad-LC WCRF/AICR Score, frequency of red meat/processed meat consumption (times/day) was divided according to tertile distribution: tertile 1 ( $\leq 1.392$ ), tertile 2 ( $> 1.392 < 2.359$ ), tertile 3 ( $\geq 2.359$ ).
